# Supplementary material
Source: publisher site journal article supplement (https://www.dovepress.com/article/301844)
Supplement: Supplementary file 1 [file get_supplementary_file.php]

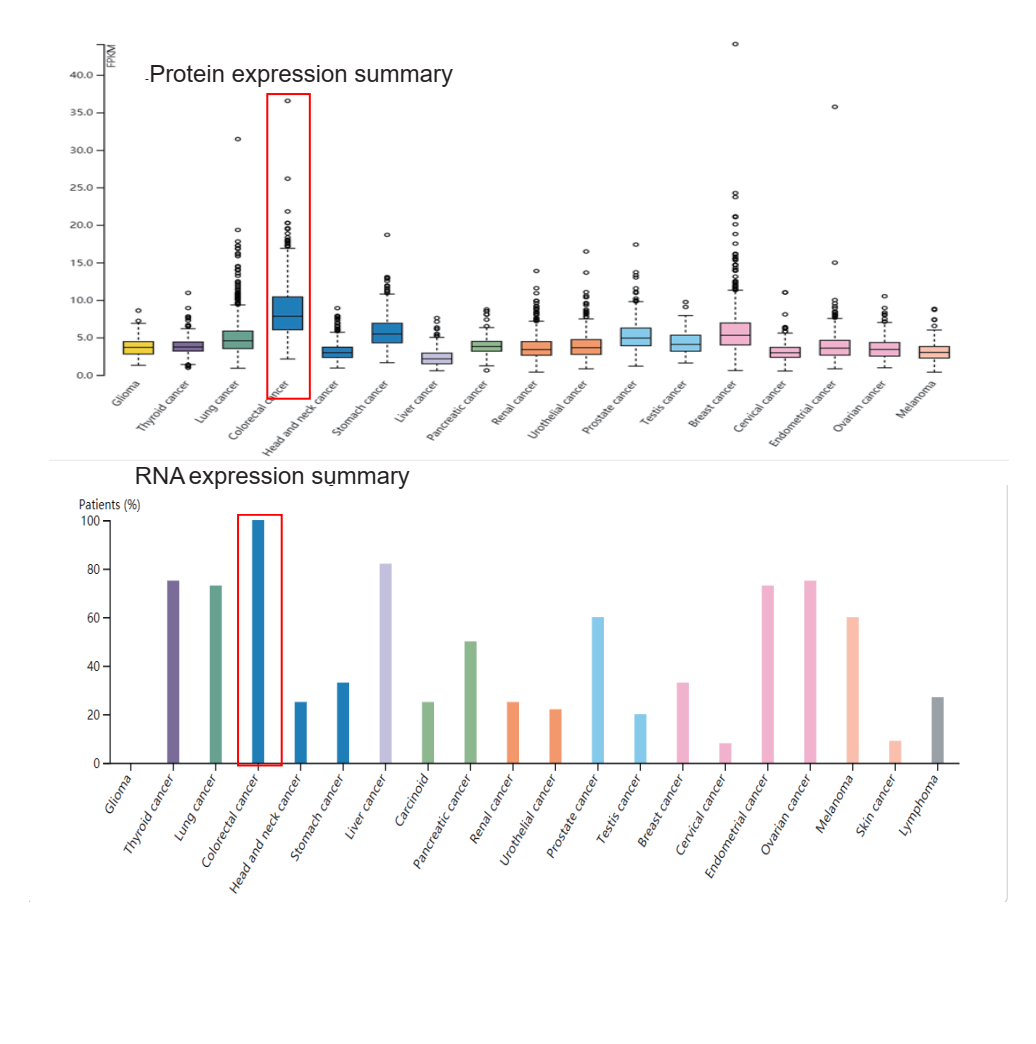


**Figure S1 mRNA and protein expression of *AVL9* in different tumors.** Note: Both *AVL9* mRNA and protein were significantly highly expressed in colorectal cancer tissues.


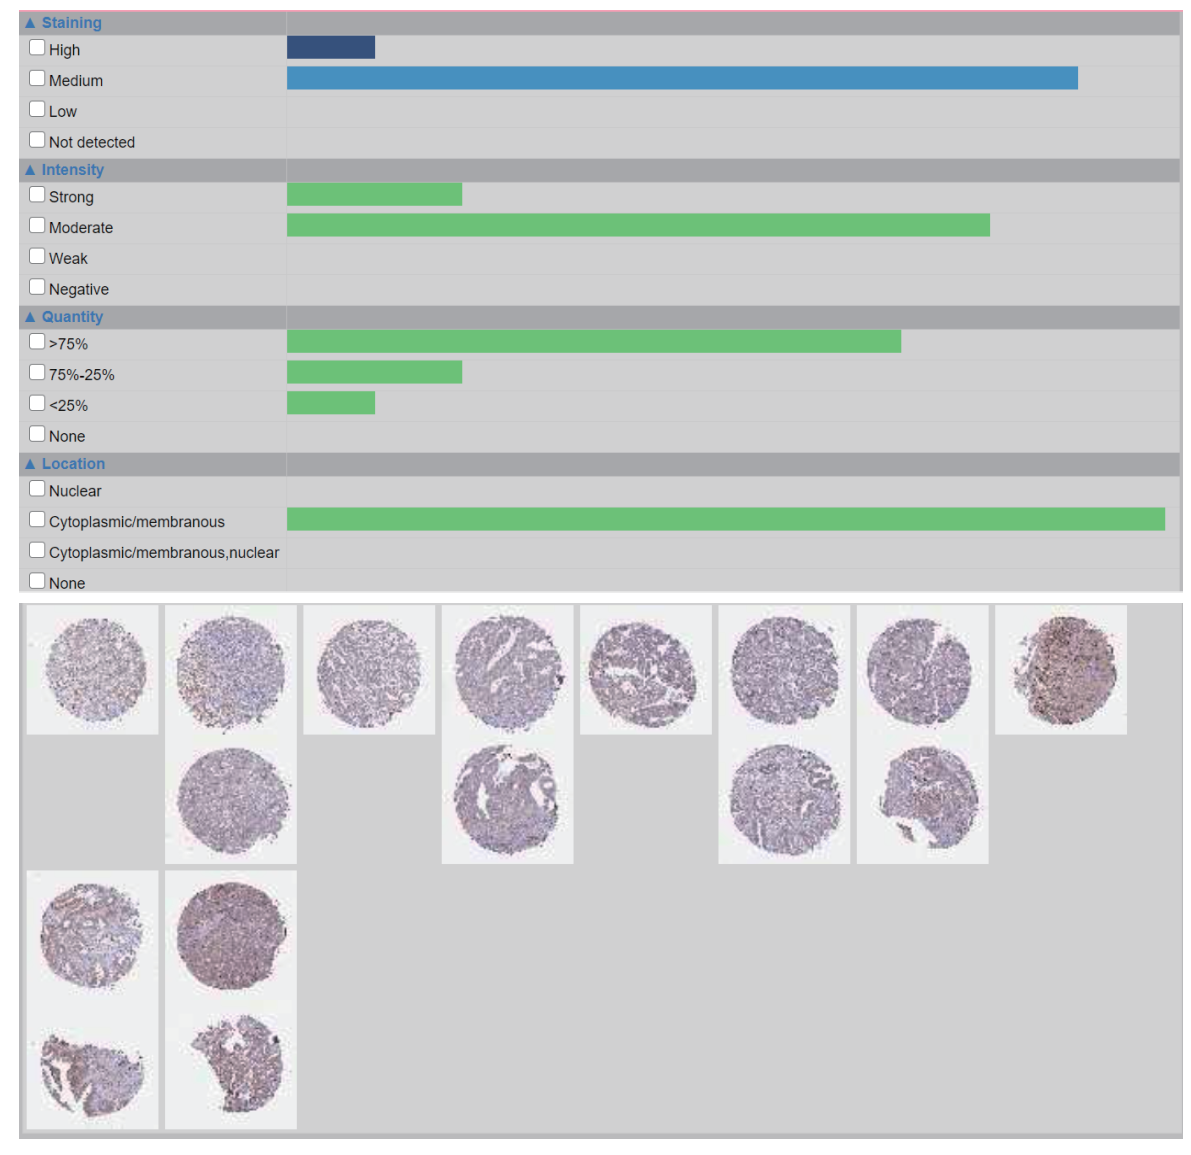
 **Figure S2 IHC analysis of *AVL9* in CRC tissues.** Note: *AVL9* was highly expressed in the staining, intensity, and quantity analyses. CRC, colorectal cancer; IHC, IHC Immunohistochemical


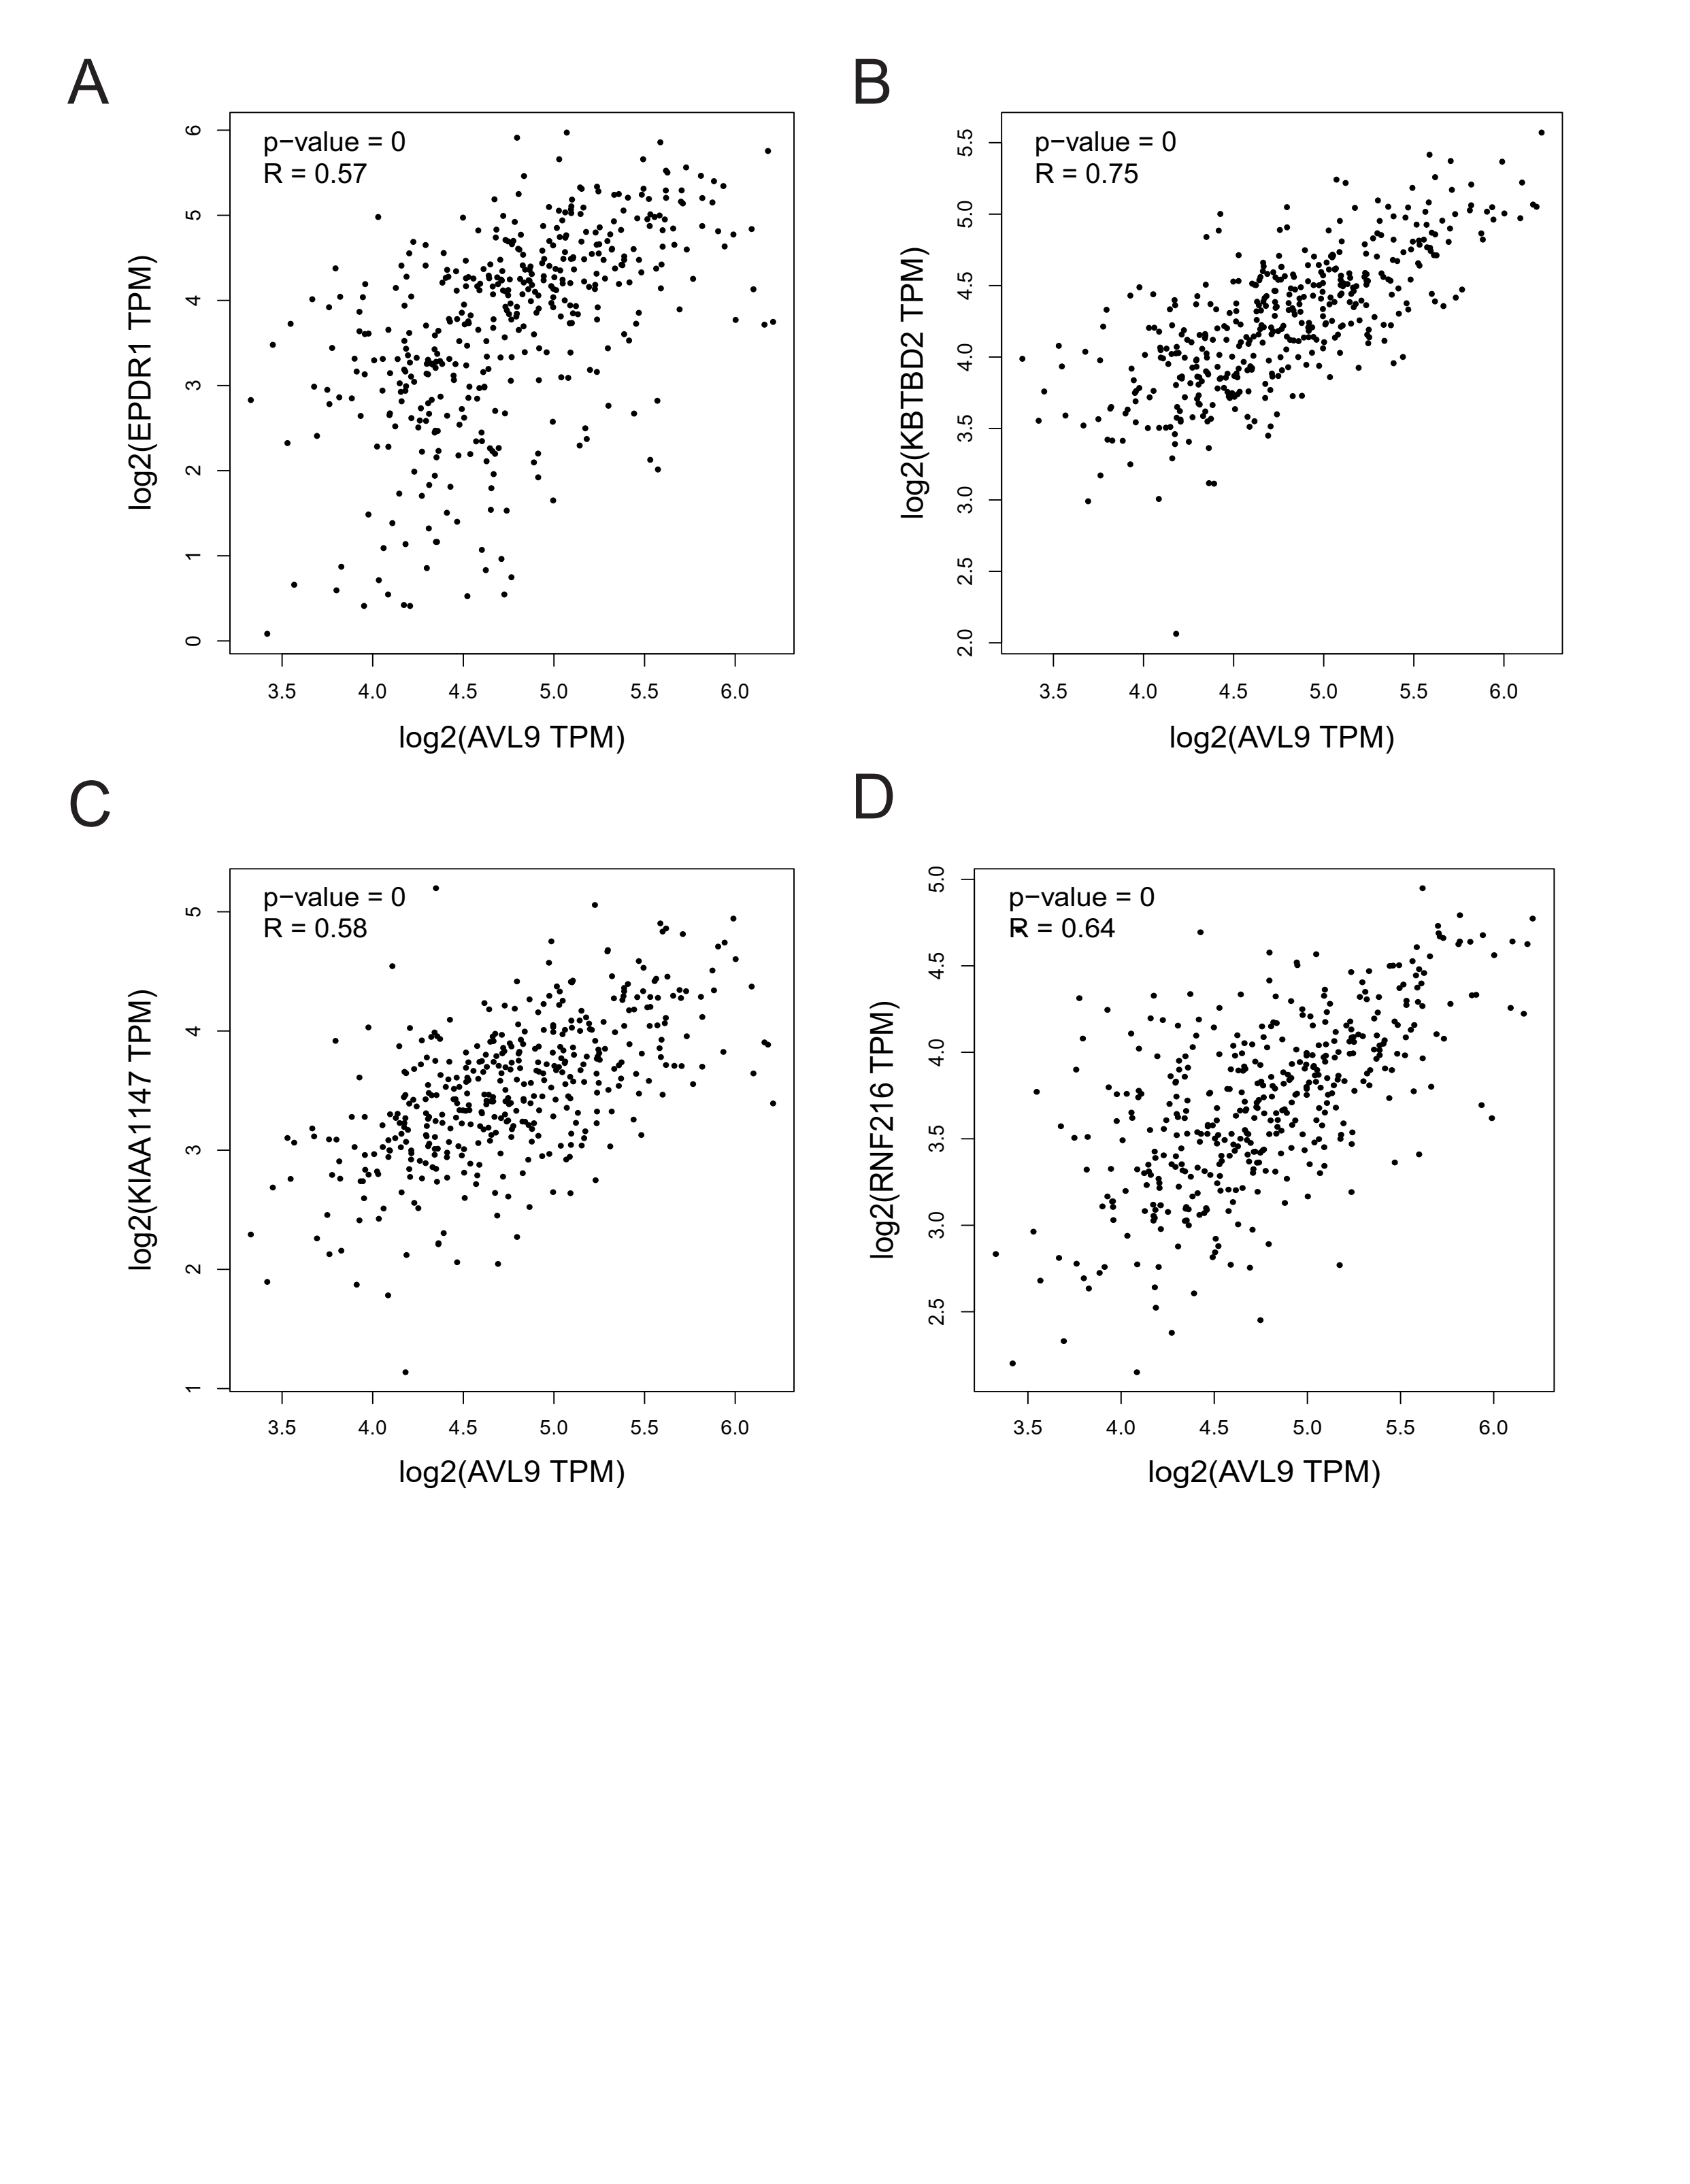
 **Figure S3** **The correlation between AVL9 and KBTBD2, KIAA1147, RNF216 were all positively correlated according to GEPIA data.**
